# Supplementary material for: Auto-ICell: An Automated and Cost-Effective Integrated Droplet Microfluidic Platform for Real-Time Analysis of Single-Cell Morphology and Apoptosis
Source: Research Square preprint supplement (doi:10.21203/rs.3.rs-3647331/v1), 2023-12-14
Supplement: Supplementary file 1 [file Bright field time cost.xlsx]

## Sheet: 工作表2
摘要輸出
迴歸統計
R 的倍數	0.986192
R 平方	0.972575
調整的 R 平方	0.965718
標準誤	0.013215
觀察值個數	6
ANOVA
	自由度	SS	MS	F	顯著值
迴歸	1	0.0247723	0.0247723	141.851	0.000284673
殘差	4	0.000698544	0.000174636
總和	5	0.0254708
	係數	標準誤	t 統計	P-值	下限 95%	上限 95%	下限 95.0%	上限 95.0%
截距	1.76585	0.00942069	187.444	4.8594e-09	1.7397	1.79201	1.7397	1.79201
X 變數 1	0.0220754	0.0018535	11.9101	0.000284673	0.0169293	0.0272216	0.0169293	0.0272216

## Sheet: 工作表1
Time Cost: Our algorithm (second)					Time Cost: Manual (ImageJ) (second)
Droplet number	Single	Total			Droplet number		Total Time
1	1.772	1.772			1	33.82	33.82		33.82		33.82	39.7	45.56	51.9	56.24	77.27
2		1.824			2	5.88	39.7		39.7
3		1.843			3	5.86	45.56		45.56
4		1.856			4	6.34	51.9		51.9
5		1.865			5	4.34	56.24		56.24
10		1.987			10	21.03	77.27		77.27
		1.772	1.824	1.843	1.856	1.865	1.987
		33.82	0	0	0	0	0
