# Supplementary material for: Auto-ICell: An Automated and Cost-Effective Integrated Droplet Microfluidic Platform for Real-Time Analysis of Single-Cell Morphology and Apoptosis
Source: Research Square preprint supplement (doi:10.21203/rs.3.rs-3647331/v1), 2023-12-14
Supplement: Supplementary file 3 [file Dye ratio and droplet size.xlsx]

## Sheet: Sheet1
color	ratio1	ratio2	ratio3	ratio4	ratio5	ave_r	var_r		p1	p2	p3	p4	p5	ave_p	var_p		d1	d2	d3	d4	d5	ave_d	var_d
OB	0.0311193	-0.000451277	0.002064	0.00445853	0.0209822	0.0116346	0.000189048		2297	2427	2301	2351	2306	2336.4	3037.8		819.641	832.367	823.949	821.04	818.205	823.04	31.6879
OR	0.536543	0.514754	0.587442	0.535012	0.536109	0.541972	0.000730147		2431	2507	2441	2470	2477	2465.2	916.2		855.742	859.238	855.668	857.165	848.208	855.204	17.3912
OM	0.527872	0.531486	0.530065	0.537899	0.542267	0.533918	3.5717e-05		2638	2650	2573	2551	2482	2578.8	4687.7		900.105	896.195	893.244	896.118	881.111	893.355	52.7978
3x_mix	0.365283	0.362814	0.35259	0.349087	0.337229	0.353401	0.000127641		2610	2579	2570	2534	2506	2559.8	1638.2		906.287	906.552	905.406	890.034	887.421	899.14	91.3822
9x_mix	0.155049	0.167423	0.151417	0.15672	0.138474	0.153817	0.000109061		2579	2438	2435	2454	2407	2462.6	4520.3		867.827	859.027	845.422	844.138	837.085	850.7	154.744
3x_R									2449	2377	2448	2402	2352	2405.6	1846.3		849.386	851.486	847.417	838.683	831.483	843.691	70.2974
9x_R									2686	2855	2701	2670	2698	2722	5676.5		938.727	964.458	937.091	920.398	925.455	937.226	291.395
