# Supplementary material for: Auto-ICell: An Automated and Cost-Effective Integrated Droplet Microfluidic Platform for Real-Time Analysis of Single-Cell Morphology and Apoptosis
Source: Research Square preprint supplement (doi:10.21203/rs.3.rs-3647331/v1), 2023-12-14
Supplement: Supplementary file 4 [file HSV-based cell analysis results.xlsx]

## Sheet: Sheet1
Image Order	Number of Cells	Total Area	Average Circularity
1	1	1505	0.890945
2	2	1397	0.991556
3	3	1931	0.89883
4	2	2026	0.898013
5	1	897	0.986072
6	1	787	0.965296
7	0	0
8	2	2850	0.936819
9	5	3788	0.935592
10	3	3228	0.951756
11	2	1678	0.869865
12	0	0
13	0	0
14	0	0
15	1	1055	0.978019
16	1	782	0.784165
17	0	0
18	0	0
19	0	0
